# Supplementary material for: Modeling Parental Influence on Food Consumption among Chinese Adolescents through Self-Efficacy: A Path Analysis
Source: MDPI journal article supplement (doi:10.3390/nu13124454), 2021-12-14
Supplement: s1 [file s1]

**Table S1.** Measures of parental influence, self-efficacy, perceived peer influence, and food consumption.

| Items                              |                                                                                                               | Response options                                                                                                               | Scoring       |
|------------------------------------|---------------------------------------------------------------------------------------------------------------|--------------------------------------------------------------------------------------------------------------------------------|---------------|
| Parental control F&V               | My parent(s) have to make sure that I eat enough fruits and vegetables                                        | Strongly disagree = 1,<br>Somewhat disagree = 2,<br>Neither disagree nor agree =3,                                             | Average score |
|                                    | My parent(s) make me eat fruits and vegetables                                                                | Somewhat agree =4,<br>Strongly agree =5.                                                                                       |               |
| Parental modeling F&V              | My parent(s) try to eat fruits and vegetables when I'm around                                                 | Strongly disagree = 1,<br>Somewhat disagree = 2,<br>Neither disagree nor agree =3,<br>Somewhat agree =4,<br>Strongly agree =5. |               |
| Parent-teen co-decision making F&V | My parent(s) try and I decide together how many fruits and vegetables I have to eat                           | Strongly disagree = 1,<br>Somewhat disagree = 2,<br>Neither disagree nor agree =3,<br>Somewhat agree =4,<br>Strongly agree =5. |               |
| Parental control S&J               | My parent(s) have to make sure that I don't drink too much sugar-sweetened beverage or eat too much junk food | Strongly disagree = 1,<br>Somewhat disagree = 2,<br>Neither disagree nor agree =3,                                             | Average score |
|                                    | My parent(s) don't buy a lot of sugar-sweetened beverage or junk food for me                                  | Somewhat agree =4,<br>Strongly agree =5.                                                                                       |               |

|                                    |                                                                                                             |                                                                                                                                |
|------------------------------------|-------------------------------------------------------------------------------------------------------------|--------------------------------------------------------------------------------------------------------------------------------|
| Parental modeling S&J              | My parent(s) try to avoid eating sugar-sweetened beverage and junk food when I'm around                     | Strongly disagree = 1,<br>Somewhat disagree = 2,<br>Neither disagree nor agree =3,<br>Somewhat agree =4,<br>Strongly agree =5. |
| Parent-teen co-decision making S&J | My parent(s) and I decide together how much sugar-sweetened beverage or junk food I can have                | Strongly disagree = 1,<br>Somewhat disagree = 2,<br>Neither disagree nor agree =3,<br>Somewhat agree =4,<br>Strongly agree =5. |
| Self-efficacy F&V                  | I feel confident in my ability to eat fruits and vegetables every day                                       | Strongly disagree = 1,<br>Somewhat disagree = 2,<br>Neither disagree nor agree =3,<br>Somewhat agree =4,<br>Strongly agree =5. |
| Self-efficacy S&J                  | I feel confident in my ability to limit the amount of junk food or sugar-sweetened beverage I eat and drink | Strongly disagree = 1,<br>Somewhat disagree = 2,<br>Neither disagree nor agree =3,<br>Somewhat agree =4,<br>Strongly agree =5. |
| Perceived peer influence F&V       | My friends eat fruits and vegetables most days of the week                                                  | Strongly disagree = 1,<br>Somewhat disagree = 2,<br>Neither disagree nor agree =3,<br>Somewhat agree =4,<br>Strongly agree =5. |

|                              |                                                                                                                                                                                                                                                                                                                                                                                                                                                                                                                                                                                                                                                                                                                                                                                                                                                                                                                       |                                                                                                                                                                                     |             |
|------------------------------|-----------------------------------------------------------------------------------------------------------------------------------------------------------------------------------------------------------------------------------------------------------------------------------------------------------------------------------------------------------------------------------------------------------------------------------------------------------------------------------------------------------------------------------------------------------------------------------------------------------------------------------------------------------------------------------------------------------------------------------------------------------------------------------------------------------------------------------------------------------------------------------------------------------------------|-------------------------------------------------------------------------------------------------------------------------------------------------------------------------------------|-------------|
| Perceived peer influence S&J | My friends eat junk food or drink sugary drinks<br>on most days of the week                                                                                                                                                                                                                                                                                                                                                                                                                                                                                                                                                                                                                                                                                                                                                                                                                                           | Strongly disagree = 5,<br>Somewhat disagree = 4,<br>Neither disagree nor agree =3,<br>Somewhat agree =2,<br>Strongly agree =1.                                                      |             |
| Consumption F&V              | 1. During the past 7 days, how many times did you drink 100% pure fruit juice like orange, apple, grape, etc.? Don't count fruit-flavored drinks with added sugar<br>2. During the past 7 days, how many times did you eat fruit like apples, bananas, melon, etc.? Count fresh, frozen, canned and dried fruit. Don't count fruit juices.<br>3. During the past 7 days, how many times did you eat a green salad, with or without other vegetables?<br>4. During the past 7 days, how many times did you eat other non-fried vegetables? Don't count green salad or potatoes.<br>5. During the past 7 days, how many times did you eat refried beans, baked beans, black beans or other cooked beans? Don't count green beans or string beans.<br>6. During the past 7 days, how many times did you eat any other kind of potatoes that aren't fried like baked, boiled, mashed or potatoes used in soups and stews? | Never = 0,<br>1 – 3 times in the past<br>7 days = 0.29,<br>4 – 6 times in the past<br>7 days = 0.71,<br>1 time per day = 1,<br>2 times per day = 2,<br>3 or more times per day = 3. | Total score |
| Consumption S&J              | 1. During the past 7 days, how many times did you drink sweetened fruit drinks? Don't count 100% pure fruit juice or artificially sweetened or diet drinks.<br>2. During the past 7 days, how many times did you drink regular soda or pop? Don't count diet or zero calorie sodas.<br>3. During the past 7 days, how many times did you drink energy drinks like Red Bull, etc.? These drinks usually have caffeine<br>4. During the past 7 days, how many times did you drink sport drinks?                                                                                                                                                                                                                                                                                                                                                                                                                         | Never = 0,<br>1 – 3 times in the past<br>7 days = 0.29,<br>4 – 6 times in the past<br>7 days = 0.71,<br>1 time per day = 1,                                                         | Total score |

5. During the past 7 days, how many times did you eat any type of candy or chocolate? Count candy bars, lollipops/suckers, sour candies, etc. Don't count sugar-free candy. 2 times per day = 2,  
3 or more times per day = 3.
6. During the past 7 days, how many times did you eat cookies, cakes, cupcakes, doughnuts, brownies, pop-tarts, etc.?
7. During the past 7 days, how many times did you eat regular potato chips, corn chips or cheese puffs?
8. During the past 7 days, how many times did you eat fried potatoes?
9. During the past 7 days, how many times did you eat ice cream or other frozen desserts? Don't count sugar-free kinds.

---

Note: F&V = fruit and vegetable. S&J = sugar-sweetened beverage and junk food.
